# Supplementary material
Source: PubMed Central journal article supplement (PMC2148380)

Mean Spectra N2  
(15 replicates)

Standard Deviation Spectra N2  
(15 replicates)

Coefficient of variation Spectra N2  
(15 replicates)

Distribution of Coefficient  
of variation

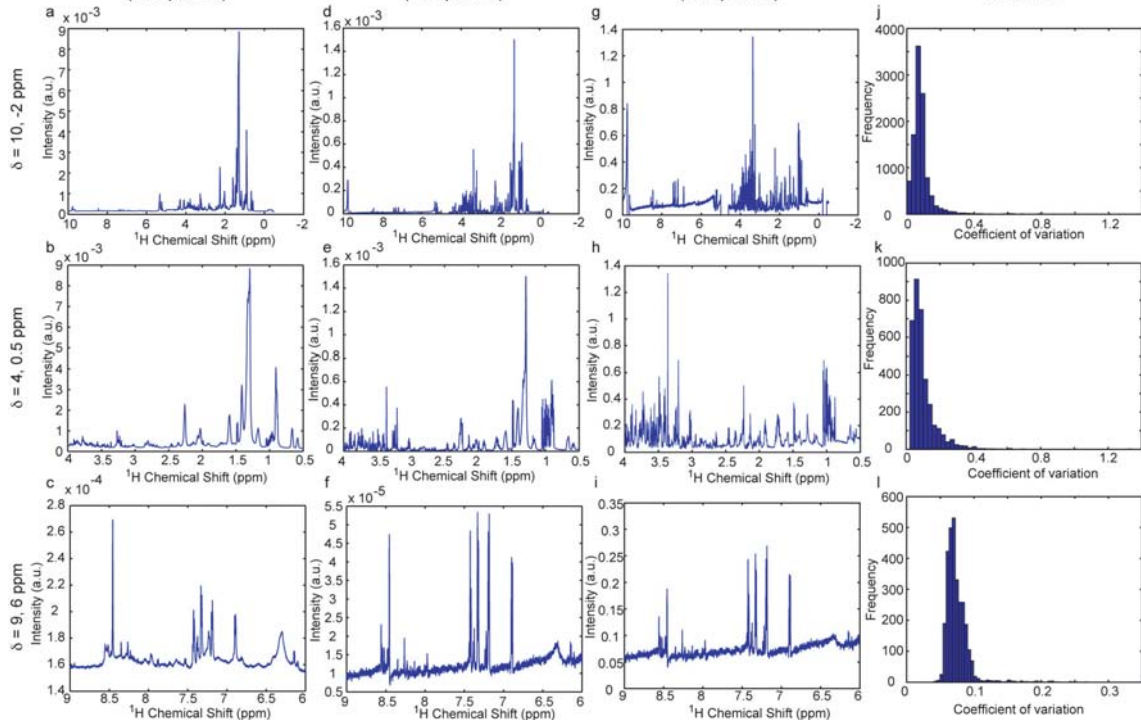

Supplement: pnas_0707393104_1.pdf [file pnas_0707393104_1.pdf]
