# Supplementary material
Source: PubMed Central journal article supplement (PMC2148380)
Supplement: pnas_0707393104_5.pdf [file pnas_0707393104_5.pdf]

Table 1. Assignment of resonances in the 700 MHz  $^1\text{H}$  HRMAS-NMR spectrum of *C. elegans* based on the literature (1)

| Metabolite                                          | Moieties (key)                                                                                                                                                                                                                                                                                                                                                              | Chemical shift (multiplicity)                                                   |
|-----------------------------------------------------|-----------------------------------------------------------------------------------------------------------------------------------------------------------------------------------------------------------------------------------------------------------------------------------------------------------------------------------------------------------------------------|---------------------------------------------------------------------------------|
| Cholesterol                                         | C18 (1) and (2)                                                                                                                                                                                                                                                                                                                                                             | 0.59 (m), 0.67 (m)                                                              |
| Fatty acids                                         | $\text{CH}_3(\text{CH}_2)_n(3)$ , $\text{CH}_3\text{CH}_2\text{CH}_2\text{C}=\text{C}(4)$ ,<br>$\text{CH}_3\text{CH}_2(5)$ , $\text{CH}_3\text{CH}_2\text{CH}_2(16)$ ,<br>$\text{CH}_2\text{CH}_2\text{CH}_2\text{CO}(17)$ ,<br>$\text{CH}_2\text{CH}_2\text{CH}_2\text{CO}(19)$ ,<br>$\text{CH}_2\text{CH}_2\text{CO}(20)$ , $\text{CH}_2\text{CH}_2\text{C}=\text{C}(24)$ | 0.89(m), 0.91(m)<br>0.93(m), 1.17(m)<br>1.29(m),<br>1.34(m)<br>1.41(m), 1.60(m) |
| Isoleucine                                          | $\delta\text{CH}_3(6)$ , $\beta\text{CH}_3(12)$ , $\beta\text{CH}(31)$ , $\alpha\text{CH}(83)$                                                                                                                                                                                                                                                                              | 0.94(t), 1.01(d), 1.99(m), 3.71(d)                                              |
| Leucine                                             | $\delta\text{CH}_3(7)$ , $\delta'\text{CH}_3(8)$ ,<br>$\beta\text{CH}_2\text{-}\gamma\text{CH}(28)$ , $\alpha\text{CH}(84)$                                                                                                                                                                                                                                                 | 0.95(d), 0.96(d),<br>1.73(m), 3.74(m)                                           |
| $\alpha$ -hydroxy- <i>N</i> -valerate               | $\text{CH}_3(9)$                                                                                                                                                                                                                                                                                                                                                            | 0.97(m)                                                                         |
| Valine                                              | $\text{CH}_3(10)$ , $\text{CH}_3(14)$ , $\beta\text{CH}(39)$ , $\alpha\text{CH}(79)$                                                                                                                                                                                                                                                                                        | 0.99(d), 1.05(d), 2.26(m), 3.62(d)                                              |
| Lactate                                             | $\text{CH}_3(18)$                                                                                                                                                                                                                                                                                                                                                           | 1.33(m)                                                                         |
| Penicillamine                                       | $\text{CH}_3(21)$                                                                                                                                                                                                                                                                                                                                                           | 1.46(s)                                                                         |
| Alanine                                             | $\text{CH}_3(22)$ , $\alpha\text{CH}(87)$                                                                                                                                                                                                                                                                                                                                   | 1.48(d), 3.79(q)                                                                |
| Saccharopine                                        | $\text{H}\delta$ and $\text{H}\beta\text{ii}(23)$ , $\text{CH}_2\text{COOH}(37)$                                                                                                                                                                                                                                                                                            | 1.53(m), 2.19(m)                                                                |
| $\alpha$ -keto- $\beta$ -methyl- <i>N</i> -valerate | $\text{CH}_2(25)$ , $\text{CH}_2(27)$                                                                                                                                                                                                                                                                                                                                       | 1.64(m), 1.70(m)                                                                |
| Arginine                                            | $\gamma\text{CH}_2(26)$ , $\beta\text{CH}_2(30)$ , $\alpha\text{CH}(86)$                                                                                                                                                                                                                                                                                                    | 1.68(m), 1.92(m), 3.78(m)                                                       |
| Lysine                                              | $\beta\text{CH}_2(29)$ , $\epsilon\text{CH}_2(57)$ , $\alpha\text{CH}(85)$                                                                                                                                                                                                                                                                                                  | 1.84(m), 3.03(t), 3.77(m)                                                       |
| Proline                                             | $\beta\text{CH}_2(32)$ , $\delta\text{CH}_2(72)$ , $\alpha\text{CH}(96)$                                                                                                                                                                                                                                                                                                    | 2.03(m), 3.38(m), 4.13(m)                                                       |
| <i>N</i> -acetyl-glutamate                          | $\text{CH}_3(33)$                                                                                                                                                                                                                                                                                                                                                           | 2.05(s)                                                                         |
| Isovalerate                                         | $\text{CH}_2(34)$                                                                                                                                                                                                                                                                                                                                                           | 2.06(d)                                                                         |

|                              |                                                                     |                                          |
|------------------------------|---------------------------------------------------------------------|------------------------------------------|
| Glutamate/Glutamine          | $\beta\text{CH}_2(35)$                                              | 2.08(m)                                  |
| Methionine                   | S- $\text{CH}_3(36)$ , S- $\text{CH}_2(47)$ , $\alpha\text{CH}(89)$ | 2.14(m), 2.64(m), 3.85(m)                |
| Homocysteine                 | $\beta\text{CH}_2(38)$                                              | 2.22(m)                                  |
| Glutamate                    | $\gamma\text{CH}_2(40)$                                             | 2.35(m)                                  |
| Pyroglutamate                | $\text{CH}_2(41)$ , $\text{CH}_2(45)$                               | 2.41(m), 2.49(m)                         |
| Glutamine                    | $\gamma\text{CH}_2(42)$                                             | 2.46(d)                                  |
| Succinate                    | $\text{CH}_2(43)$                                                   | 2.46(s)                                  |
| $\beta$ -alanine             | $\text{CH}_2\text{COOH}(46)$ , $\text{NCH}_2(66)$                   | 2.55(m), 3.18(m)                         |
| Aspartate                    | $\beta\text{CH}_2(48)$ and (53)                                     | 2.68(d), 2.82(dd)                        |
| <i>N</i> -acetyl-L-aspartate | $\text{CH}_2(49)$                                                   | 2.70(d)                                  |
| $\alpha$ -ketobutyrate       | $\text{CH}_2(50)$                                                   | 2.73(m)                                  |
| Dimethylamine                | $\text{CH}_3(51)$                                                   | 2.74(s)                                  |
| Sarcosine                    | $\text{CH}_3(52)$                                                   | 2.76(s)                                  |
| Asparagine                   | $\beta\text{CH}_2(54)$ and (56)                                     | 2.87(d), 2.97(d)                         |
| Melatonin                    | $\text{CH}_2\text{CH}_2\text{NH}(55)$                               | 2.94(m)                                  |
| Tyrosine                     | $\beta\text{CH}_2(58)$ , $\beta\text{CH}_2(67)$<br>aromatic(111)    | 3.05(d), 3.20(d),<br>6.9 (m) and 7.19(m) |
| Ornithine                    | $\delta\text{CH}_2(59)$                                             | 3.08(m)                                  |
| Indole-3-lactate             | $\text{CH}_2(60)$                                                   | 3.10(m)                                  |
| Cysteine                     | $\text{CH}_2(61)$                                                   | 3.11(m)                                  |
| Phenylalanine                | $\beta\text{CH}_2(62)$ , $\beta\text{CH}_2(70)$ , aromatic(115)     | 3.13(m), 3.29(m), 7.42(m)                |
| Histidine                    | $\beta\text{CH}_2(63)$ , $\alpha\text{CH}(93)$                      | 3.14(m), 3.97(dd)                        |
| Homocarnosine                | $\alpha\text{CH}_2(55)$                                             | 3.16(m)                                  |

|                                            |                                                                                                                   |                                                 |
|--------------------------------------------|-------------------------------------------------------------------------------------------------------------------|-------------------------------------------------|
| $\beta$ -glucose                           | H <sub>2</sub> (68), H <sub>4</sub> (73), H <sub>3</sub> (75),<br>CH <sub>2</sub> -C6(91), H <sub>1</sub> (105)   | 3.25(m), 3.41(t), 3.48(t),<br>3.92(dd), 4.64(d) |
| Trimethylamine- <i>N</i> -<br>oxyde (TMAO) | CH <sub>3</sub> (69)                                                                                              | 3.27(s)                                         |
| 5-methoxytryptamine                        | CH <sub>2</sub> NH <sub>2</sub> (70)                                                                              | 3.33(m)                                         |
| $\alpha$ -glucose                          | H <sub>4</sub> (74), H <sub>2</sub> (76), CH <sub>2</sub> -C6(82), H <sub>1</sub> (107)                           | 3.42(t), 3.52(dd), 3.70(dd), 5.23(d)            |
| Glycerol                                   | CH <sub>2</sub> (77), CH <sub>2</sub> (80), C2-H(90)                                                              | 3.56(dd), 3.65(dd), 3.87(m)                     |
| Threonine                                  | $\alpha$ CH(78), $\beta$ CH(98)                                                                                   | 3.60(d), 4.26(m)                                |
| Choline in lipids                          | NCH <sub>2</sub> (81)                                                                                             | 3.67(m)                                         |
| Glycerate                                  | CH <sub>2</sub> (88)                                                                                              | 3.84(d)                                         |
| Serine                                     | $\beta$ CH <sub>2</sub> (92), $\beta$ CH <sub>2</sub> (94),                                                       | 3.96(dd), 4.00(dd)                              |
| Glyceryl of lipids                         | CH <sub>2</sub> OCOR(95), CHOCOR(106)                                                                             | 4.09(m), 5.20(m)                                |
| Inosine                                    | H <sub>5</sub> '(97), H <sub>4</sub> '(102), H <sub>2</sub> '(110), H <sub>8</sub> (119),<br>H <sub>2</sub> (120) | 4.23(m), 4.44(m), 6.10(d), 8.23(s),<br>8.35(s)  |
| Unknown                                    | (99)                                                                                                              | 4.34(m)                                         |
| Unknown                                    | (100)                                                                                                             | 4.39(m)                                         |
| Dihydroxyacetone                           | CH <sub>2</sub> (101)                                                                                             | 4.42(s)                                         |
| Folate                                     | CH <sub>2</sub> (103)                                                                                             | 4.53(s)                                         |
| $\beta$ -galactose                         | H <sub>1</sub> (104)                                                                                              | 4.57(d)                                         |
| Unsaturated lipids                         | =CHCH <sub>2</sub> CH <sub>2</sub> (108)                                                                          | 5.33(m)                                         |
| Uracil                                     | H <sub>5</sub> (109)                                                                                              | 5.80(d)                                         |
| Indole                                     | H <sub>6</sub> (112), H <sub>7</sub> (116)                                                                        | 7.22(t), 7.53(d)                                |
| Phenylacetate                              | H <sub>2</sub> , H <sub>4</sub> and H <sub>6</sub> (113)                                                          | 7.33(t)                                         |

|                         |                      |         |
|-------------------------|----------------------|---------|
| $\beta$ -phenylpyruvate | H <sub>4</sub> (114) | 7.38(t) |
| Anserine                | H <sub>2</sub> (117) | 7.97(s) |
| Adenine                 | H <sub>8</sub> (118) | 8.19(s) |
| Formate                 | CH(121)              | 8.46(s) |
| Picolinate              | H <sub>6</sub> (122) | 8.52(s) |

---

1. Nicholson JK, Foxall PJD, Spraul M, Farrant RD, Lindon JC (1995) *Anal Chem* 67:793-811.
