# Supplementary material
Source: PubMed Central journal article supplement (PMC2148380)
Supplement: pnas_0707393104_7.pdf [file pnas_0707393104_7.pdf]

Table 3. Significant metabolic variations observed in *ctl-1(ok1242)* vs. N2 *C. elegans* nematodes in SI Fig.7c

| Metabolite (key)                                               | Chemical shift $\delta$ , ppm | Changes of direction |
|----------------------------------------------------------------|-------------------------------|----------------------|
| Lipids CH <sub>3</sub> CH <sub>2</sub> CH <sub>2</sub> C=C (4) | 0.90                          | ↓                    |
| Lipids CH <sub>3</sub> CH <sub>2</sub> CH <sub>2</sub> (17)    | 1.29                          | ↓                    |
| Lipids CH <sub>2</sub> CH <sub>2</sub> CO (20)                 | 1.41                          | ↓                    |
| Alanine (22)                                                   | 1.48                          | ↑                    |
| Lipids CH <sub>2</sub> CH <sub>2</sub> C=C (24)                | 1.59                          | ↓                    |
| Proline (32)                                                   | 2.03                          | ↓                    |
| Valine (39)                                                    | 2.26                          | ↓                    |
| TMAO (69)                                                      | 3.24                          | ↑                    |
| Glycerol (77)                                                  | 3.56                          | ↑                    |
| Glycerol (80)                                                  | 3.65                          | ↑                    |
| Arginine (86)                                                  | 3.78                          | ↑                    |
| Glycerate (88)                                                 | 3.84                          | ↑                    |
| $\beta$ -glucose (91)                                          | 3.92                          | ↑                    |
| $\beta$ -glucose (105)                                         | 4.63                          | ↑                    |
| $\alpha$ -glucose (107)                                        | 5.23                          | ↑                    |
| Unsaturated lipids (108)                                       | 5.33                          | ↓                    |

The arrows indicate the direction changes (↑ increase; ↓ decrease) in the concentration among *ctl-1(ok1242)* relative to N2. The numbers in parentheses correspond to the metabolite resonance on the 700MHz spectra in Fig. 1. Assignment is based on the literature(1).

1. Nicholson JK, Foxall PJD, Spraul M, Farrant RD, Lindon JC (1995) *Anal Chem* 67:793-811.
