# Supplementary material
Source: PubMed Central journal article supplement (PMC2148380)

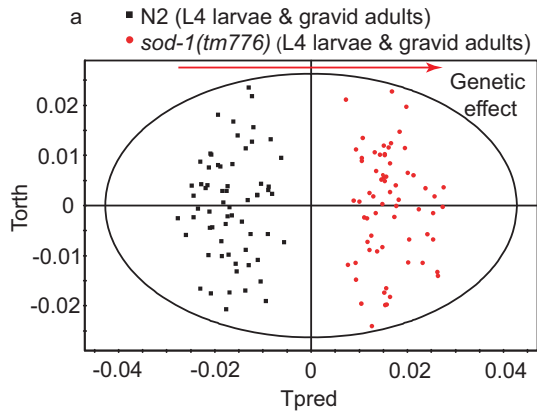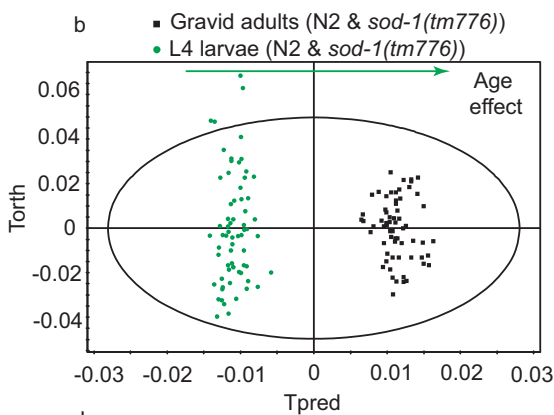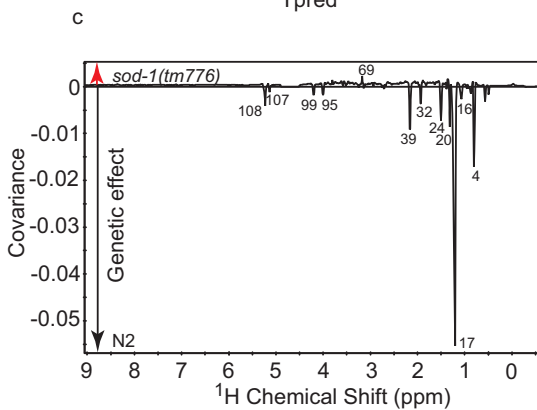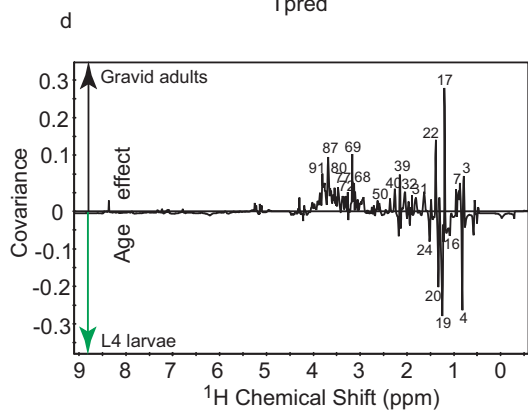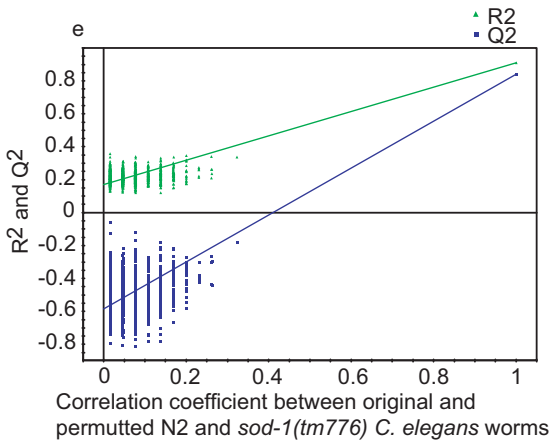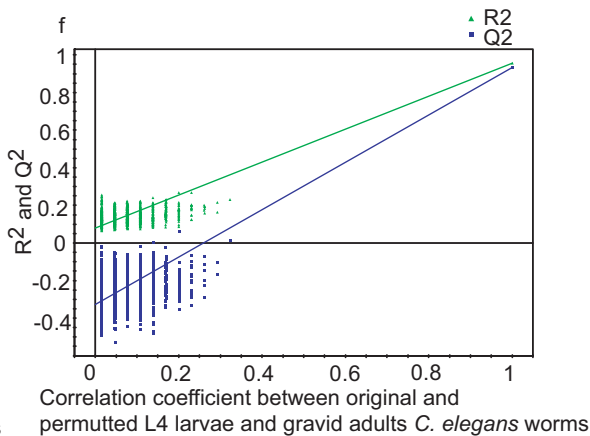

Supplement: pnas_0707393104_2.pdf [file pnas_0707393104_2.pdf]

a

- ▲ N2 gravid adults
- *sod-1(tm776)* gravid adults
- ▼ N2 & *sod-1(tm776)* L4 larvae (test set)

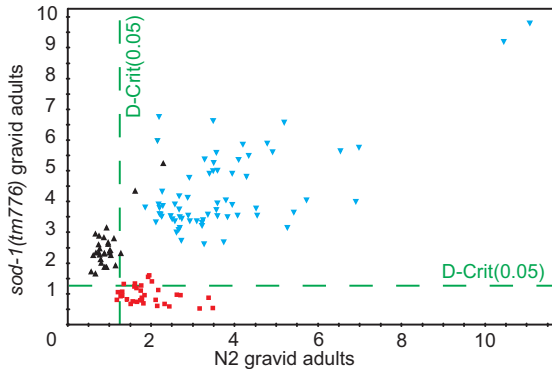

b

- N2
- ▲ *sod-1(tm776)*
- ▼ *dpy-10(e128)* (test set)

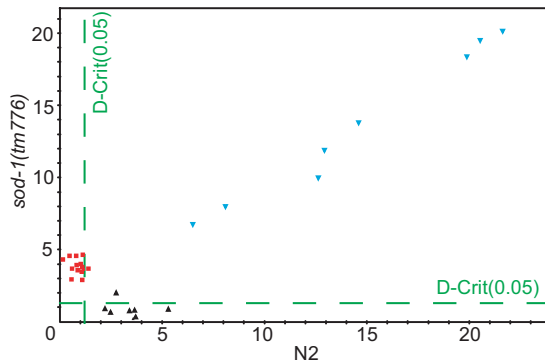

Supplement: pnas_0707393104_3.pdf [file pnas_0707393104_3.pdf]

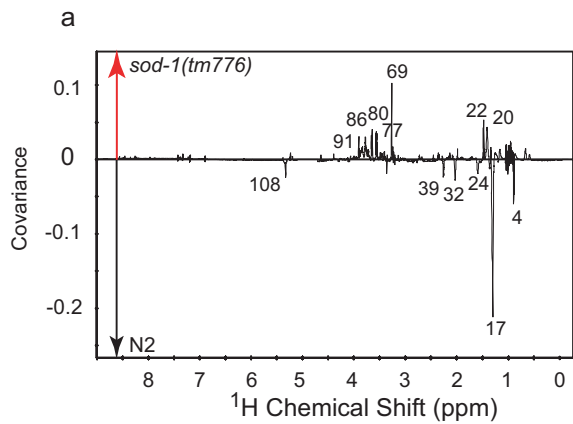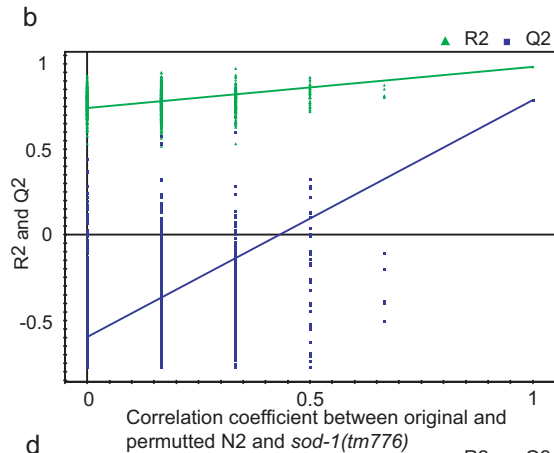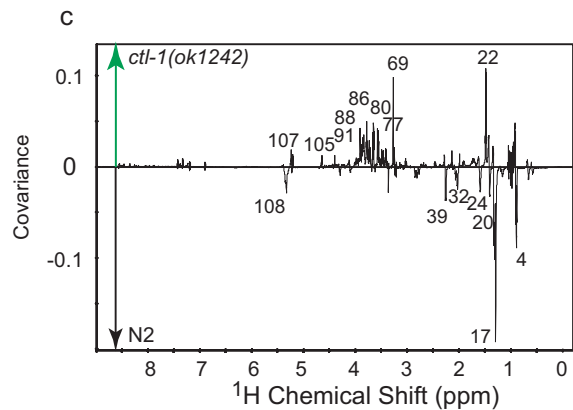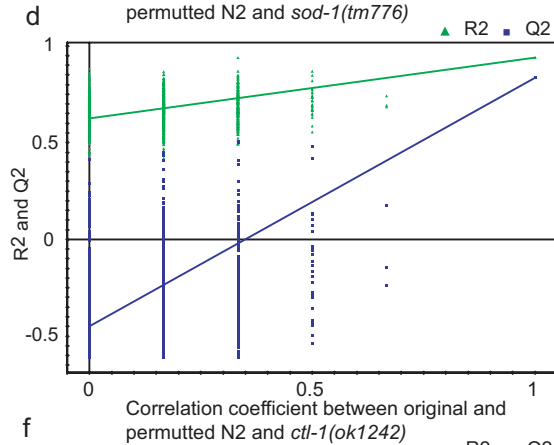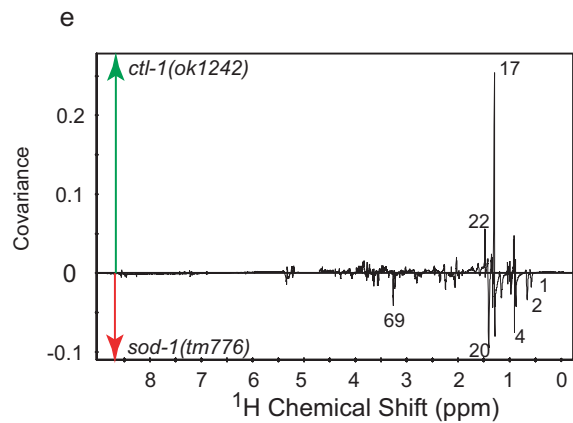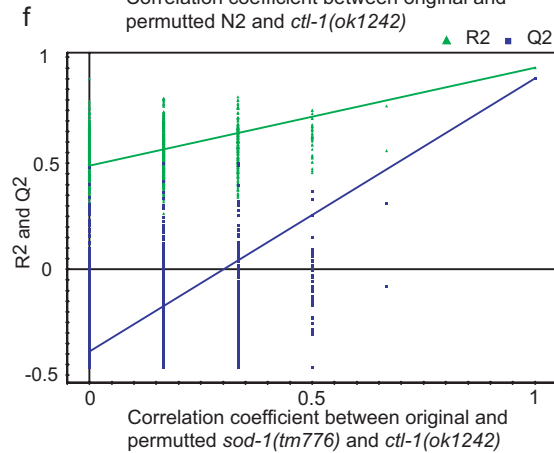

Supplement: pnas_0707393104_4.pdf [file pnas_0707393104_4.pdf]
